# Supplementary material for: Methanol electrocatalytic oxidation on highly dispersed platinum–ruthenium/graphene catalysts prepared in supercritical carbon dioxide–methanol solution
Source: Royal Society of Chemistry journal article supplement (doi:10.1039/c2ra00027j), 2012-01-01
Supplement: c2ra00027j.pdf [file c2ra00027j.pdf]

**Supporting information:**

**Methanol electrocatalytic oxidation on highly dispersed  
platinum-ruthenium/graphene catalysts prepared in supercritical  
carbon dioxide-methanol solution**

Jian Zhao\*, Lin Zhang, Hao Xue, Zhaobo Wang, Haiqing Hu\*

Key laboratory of Rubber-Plastics Ministry of Education/Shandong Provincial Key Laboratory of Rubber-Plastics, Qingdao University of Science & Technology, China, 266042; Key Laboratory of Organosilicon Chemistry and Material Technology of Ministry of Education, Hangzhou Normal University, Hangzhou, China, 31001 and Chongqing Key Laboratory of Micro/Nano Materials Engineering and Technology, Chongqing, China, 402168

\* Corresponding author. Fax: +86 0532 84022725

E-mail address: zhaojian@gmail.com (J. Zhao).

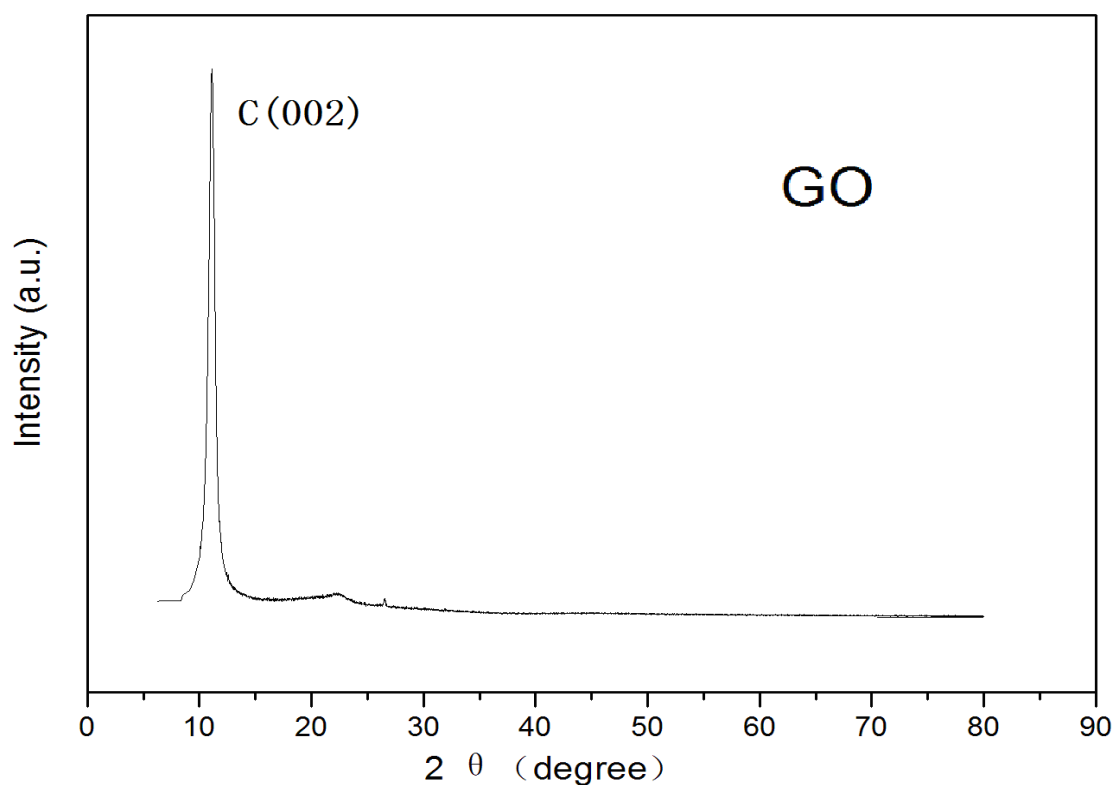

**Fig.S1 XRD patterns of GO**

**Fig.S1. The characteristic diffraction peak (0 0 2) of GO at  $2\theta = 11.1^\circ$  (corresponding to a d-spacing of 0.80 nm) is ascribed to the introduction of oxygenated functional groups such as epoxy (–O–), hydroxyl (–OH), carboxyl (–COOH) and carbonyl (–C=O) groups on both sides and edges of GO sheets.**

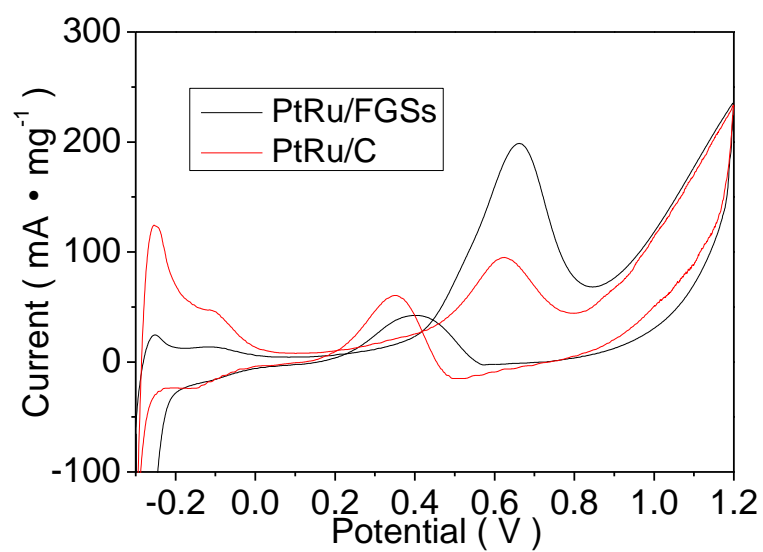

**Fig.S2.** CVs (mass specific activity vs. potential) of the PtRu/FGSs and PtRu/C electrodes for the 25th cycle in the mix solution of 1M CH<sub>3</sub>OH and 0.5M H<sub>2</sub>SO<sub>4</sub> at a scan rate of 50 mV/s.

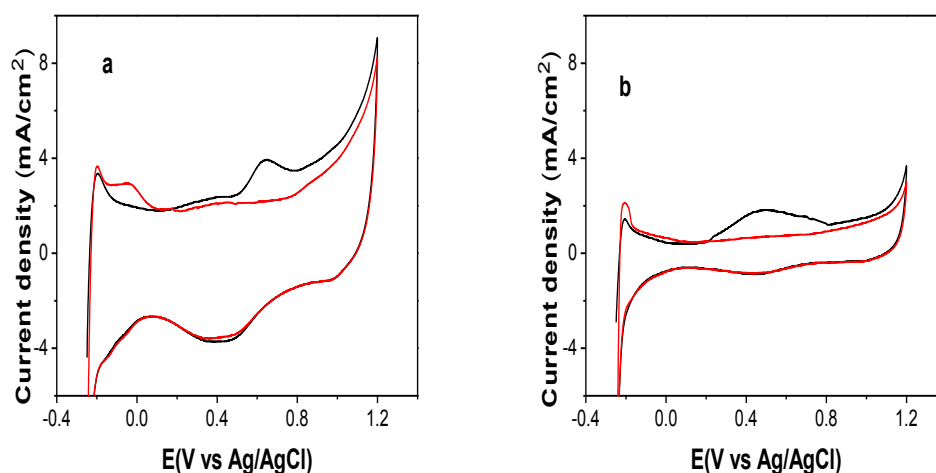

**Fig. S3. CO stripping voltammogram and the subsequent CV curves of (a) PtRu/FGSs, (b) PtRu/C in 0.5 M H<sub>2</sub>SO<sub>4</sub> solution. The measured ECSA values for PtRu/FGSs and PtRu/C are 40.46 m<sup>2</sup>/g and 29.85 m<sup>2</sup>/g, respectively.<sup>1-3</sup>**

1. J. Prabhuram, T. S. Zhao, Z. K. Tang, R. Chen and Z. X. Liang, *The Journal of Physical Chemistry B*, 2006, 110, 5245-5252.
2. T. Vidaković, M. Christov and K. Sundmacher, *Electrochimica Acta*, 2007, 52, 5606-5613.
3. T. Vidaković, M. Christov, K. Sundmacher, K. S. Nagabhushana, W. Fei, S. Kinge and H. Bönnemann, *Electrochimica Acta*, 2007, 52, 2277-2284.
